# Supplementary figures and images for: UICC Staging after Neoadjuvant/Perioperative Chemotherapy Reveals No Significant Survival Differences Compared to Primary Surgery for Locally Advanced Gastric Cancer
Source: MDPI journal article supplement (doi:10.3390/cancers14246169), 2022-12-14

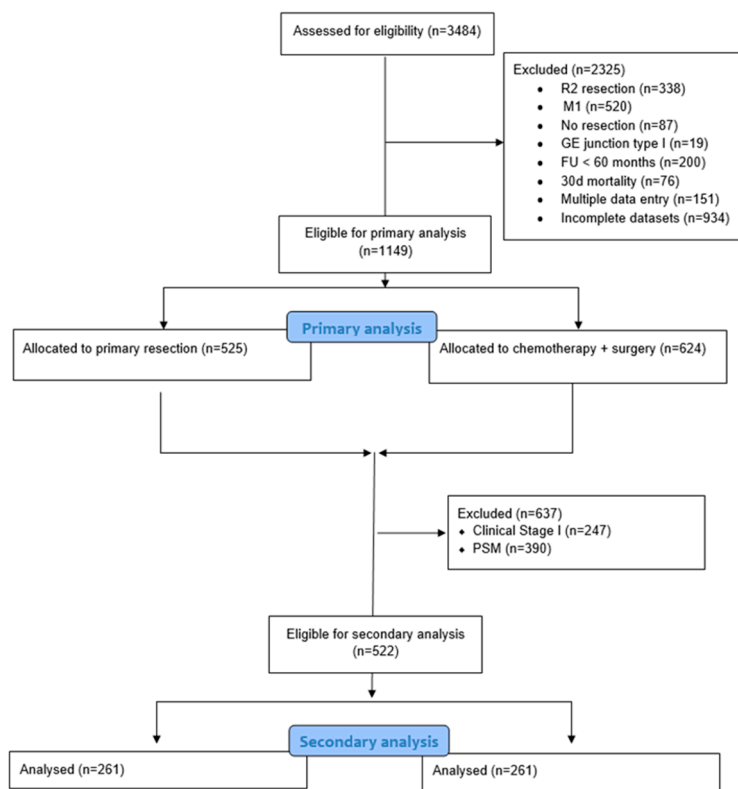

**Figure S1.** Patient inclusion flow diagram.

Supplement: s1 [file s1]
